# Supplementary material for: CenH3 distribution reveals extended centromeres in the model beetle Tribolium castaneum
Source: PubMed Central journal article supplement (PMC7598501; doi:10.1371/journal.pgen.1009115), 2020-10-30
Supplement: pgen.1009115.s007.pdf [file pgen.1009115.s007.pdf]

**S1 Table. Estimation of *Tribolium castaneum* centromere sizes**

| Chromosome           | Chromosome size [Mbp] <sup>1</sup> | Number of measured chromosomes | Centromere proportion [%] <sup>2*</sup> | Estimated centromere size [Mbp]* |
|----------------------|------------------------------------|--------------------------------|-----------------------------------------|----------------------------------|
| <b>all</b>           | 204                                | 240                            | 43.47 (±8.68)                           | 88.68 (±17.71)                   |
| <b>ch2</b>           | 22.42                              | 15                             | 42.89 (±6.97)                           | 9.62 (±1.56)                     |
| <b>ch3</b>           | 37.41                              | 31                             | 42.34 (±7.92)                           | 15.84 (±2.96)                    |
| <b>ch4</b>           | 22.52                              | 22                             | 46.48 (±5.99)                           | 10.47 (±1.35)                    |
| <b>y<sub>p</sub></b> | 5.71                               | 8                              | 40.60 (±8.09)                           | 2.31 (±0.46)                     |

<sup>1</sup> The chromosome sizes were calculated from the relative length of the individual chromosomes [30] and haploid genome size of 204 Mb [23].

<sup>2</sup> Centromere proportions were estimated from the ratio of the cCENH3 signal length demarcated by the outermost cCENH3-containing regions to the chromosome length. The quantifications are presented in the S3 Appendix.

\* Standard deviations are indicated in brackets.
