# Supplementary material for: CenH3 distribution reveals extended centromeres in the model beetle Tribolium castaneum
Source: PubMed Central journal article supplement (PMC7598501; doi:10.1371/journal.pgen.1009115), 2020-10-30
Supplement: pgen.1009115.s008.pdf [file pgen.1009115.s008.pdf]

**S1 Appendix. BLASTP search against the *Tribolium castaneum* OGS3 database using histone H3 protein sequence as a query.** Distribution of 13 Blast hits on the H3 query sequence is shown by the graphic alignment. The sequences in red represent H3 matches, while the potential CenH3 candidate (TC012577-PA) is marked in magenta. The matches in black represent partial and less significant hits. The alignments between H3 and all 13 matches are listed below, including the alignment score and expected values, and percentage of query/subject identities and positives.

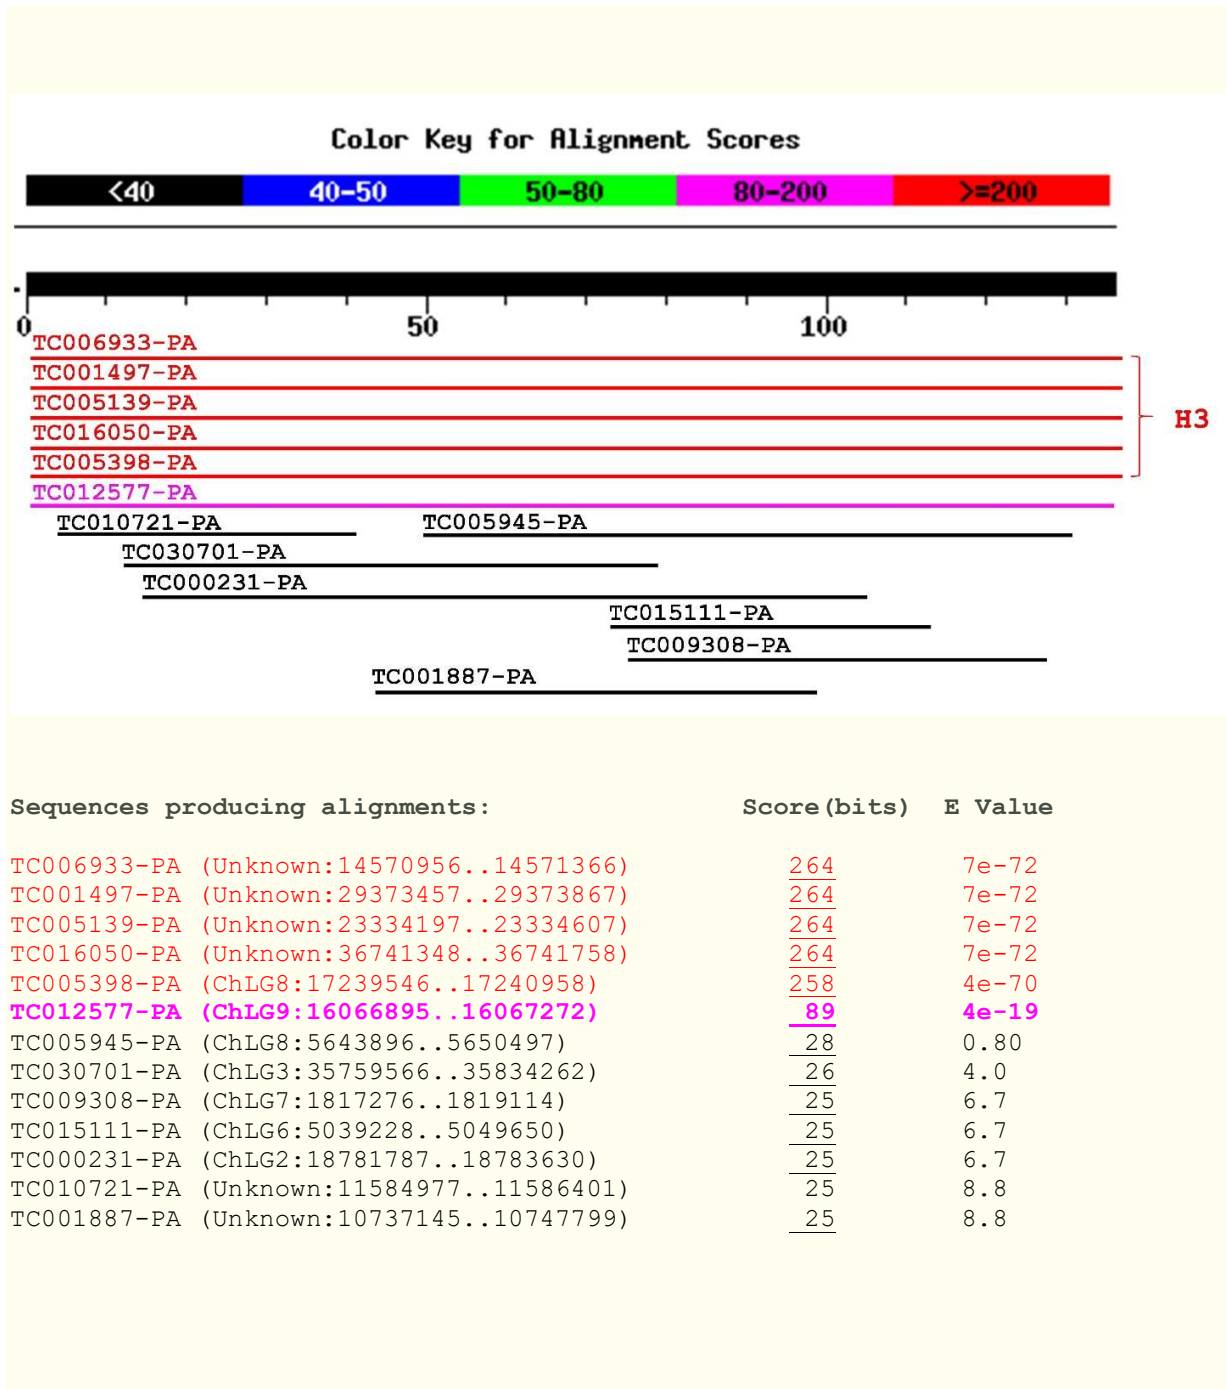

>TC006933-PA (Unknown:14570956..14571366)

Length = 136

Score = 264 bits (675), Expect = 7e-72  
Identities = 136/136 (100%), Positives = 136/136 (100%)

[GBrowse] [Subject FASTA]

```
Query: 1 MARTKQTARKSTGGKAPRKQLATKAARKSAPATGGVKKPHRYRPGTVALREIRRYQKSTE 60
      MARTKQTARKSTGGKAPRKQLATKAARKSAPATGGVKKPHRYRPGTVALREIRRYQKSTE
Sbjct: 1 MARTKQTARKSTGGKAPRKQLATKAARKSAPATGGVKKPHRYRPGTVALREIRRYQKSTE 60
Query: 61 LLIRKLPFQRLVREIAQDFKTDLRFQSSAVMALQEASEAYLVGLFEDTNLCAIHAKRVTI 120
      LLIRKLPFQRLVREIAQDFKTDLRFQSSAVMALQEASEAYLVGLFEDTNLCAIHAKRVTI
Sbjct: 61 LLIRKLPFQRLVREIAQDFKTDLRFQSSAVMALQEASEAYLVGLFEDTNLCAIHAKRVTI 120
Query: 121 MPKDIQLARRIRGERA 136
      MPKDIQLARRIRGERA
Sbjct: 121 MPKDIQLARRIRGERA 136
```

>TC001497-PA (Unknown:29373457..29373867)

Length = 136

Score = 264 bits (675), Expect = 7e-72  
Identities = 136/136 (100%), Positives = 136/136 (100%)

[GBrowse] [Subject FASTA]

```
Query: 1 MARTKQTARKSTGGKAPRKQLATKAARKSAPATGGVKKPHRYRPGTVALREIRRYQKSTE 60
      MARTKQTARKSTGGKAPRKQLATKAARKSAPATGGVKKPHRYRPGTVALREIRRYQKSTE
Sbjct: 1 MARTKQTARKSTGGKAPRKQLATKAARKSAPATGGVKKPHRYRPGTVALREIRRYQKSTE 60
Query: 61 LLIRKLPFQRLVREIAQDFKTDLRFQSSAVMALQEASEAYLVGLFEDTNLCAIHAKRVTI 120
      LLIRKLPFQRLVREIAQDFKTDLRFQSSAVMALQEASEAYLVGLFEDTNLCAIHAKRVTI
Sbjct: 61 LLIRKLPFQRLVREIAQDFKTDLRFQSSAVMALQEASEAYLVGLFEDTNLCAIHAKRVTI 120
Query: 121 MPKDIQLARRIRGERA 136
      MPKDIQLARRIRGERA
Sbjct: 121 MPKDIQLARRIRGERA 136
```

>TC005139-PA (Unknown:23334197..23334607)

Length = 136

Score = 264 bits (675), Expect = 7e-72  
Identities = 136/136 (100%), Positives = 136/136 (100%)

[GBrowse] [Subject FASTA]

```
Query: 1 MARTKQTARKSTGGKAPRKQLATKAARKSAPATGGVKKPHRYRPGTVALREIRRYQKSTE 60
      MARTKQTARKSTGGKAPRKQLATKAARKSAPATGGVKKPHRYRPGTVALREIRRYQKSTE
Sbjct: 1 MARTKQTARKSTGGKAPRKQLATKAARKSAPATGGVKKPHRYRPGTVALREIRRYQKSTE 60
Query: 61 LLIRKLPFQRLVREIAQDFKTDLRFQSSAVMALQEASEAYLVGLFEDTNLCAIHAKRVTI 120
      LLIRKLPFQRLVREIAQDFKTDLRFQSSAVMALQEASEAYLVGLFEDTNLCAIHAKRVTI
Sbjct: 61 LLIRKLPFQRLVREIAQDFKTDLRFQSSAVMALQEASEAYLVGLFEDTNLCAIHAKRVTI 120
Query: 121 MPKDIQLARRIRGERA 136
      MPKDIQLARRIRGERA
Sbjct: 121 MPKDIQLARRIRGERA 136
```

>TC016050-PA (Unknown:36741348..36741758)

Length = 136

Score = 264 bits (675), Expect = 7e-72  
Identities = 136/136 (100%), Positives = 136/136 (100%)

[GBrowse] [Subject FASTA]

```
Query: 1 MARTKQTARKSTGGKAPRKQLATKAARKSAPATGGVKKPHRYRPGTVALREIRRYQKSTE 60
MARTKQTARKSTGGKAPRKQLATKAARKSAPATGGVKKPHRYRPGTVALREIRRYQKSTE
Sbjct: 1 MARTKQTARKSTGGKAPRKQLATKAARKSAPATGGVKKPHRYRPGTVALREIRRYQKSTE 60
Query: 61 LLIRKLPFQRLVREIAQDFKTDLRFQSSAVMALQEASEAYLVGLFEDTNLCAIHAKRVTI 120
LLIRKLPFQRLVREIAQDFKTDLRFQSSAVMALQEASEAYLVGLFEDTNLCAIHAKRVTI
Sbjct: 61 LLIRKLPFQRLVREIAQDFKTDLRFQSSAVMALQEASEAYLVGLFEDTNLCAIHAKRVTI 120
Query: 121 MPKDIQLARRIRGERA 136
MPKDIQLARRIRGERA
Sbjct: 121 MPKDIQLARRIRGERA 136
```

>TC005398-PA (ChLG8:17239546..17240958)

Length = 136

Score = 258 bits (660), Expect = 4e-70  
Identities = 132/136 (97%), Positives = 135/136 (99%)

[GBrowse] [Subject FASTA]

```
Query: 1 MARTKQTARKSTGGKAPRKQLATKAARKSAPATGGVKKPHRYRPGTVALREIRRYQKSTE 60
MARTKQTARKSTGGKAPRKQLATKAARKSAP+TGGVKKPHRYRPGTVALREIRRYQKSTE
Sbjct: 1 MARTKQTARKSTGGKAPRKQLATKAARKSAPSTGGVKKPHRYRPGTVALREIRRYQKSTE 60
Query: 61 LLIRKLPFQRLVREIAQDFKTDLRFQSSAVMALQEASEAYLVGLFEDTNLCAIHAKRVTI 120
LLIRKLPFQRLVREIAQDFKTDLRFQS+A+ ALQEASEAYLVGLFEDTNLCAIHAKRVTI
Sbjct: 61 LLIRKLPFQRLVREIAQDFKTDLRFQSSAAIGALQEASEAYLVGLFEDTNLCAIHAKRVTI 120
Query: 121 MPKDIQLARRIRGERA 136
MPKDIQLARRIRGERA
Sbjct: 121 MPKDIQLARRIRGERA 136
```

>TC012577-PA (ChLG9:16066895..16067272)

Length = 125

Score = 89.4 bits (220), Expect = 4e-19  
Identities = 59/138 (42%), Positives = 71/138 (51%), Gaps = 19/138 (13%)

[GBrowse] [Subject FASTA]

```
Query: 1 MARTKQTARKSTGGKAPRKQLATKAARKSAPATGGVKKPHRYRPGTVALREIRRYQKSTE 60
MAR+K+T K + + K YR LR I++ Q STE
Sbjct: 1 MARSKKTNPKNKPSASTSYFIGNK-----EYRIRLKLRLMIKLLQMSSTE 44
Query: 61 LLIRKLPFQRLVREIAQDFKTDLRFQSSAVMALQEASEAYLVGLFEDTNLCAIHAKR 117
L I KL F RL+RE+ Q DLR Q SA+ AL EASEAYL LF D+NL A HA R
Sbjct: 45 LCIPKLSFSRLIRELLQSHSRGTRDLRIQKSALQALHEASEAYLTALFADSNLLAAHAHR 104
Query: 118 VTIMPKDIQLARRIRGER 135
VTI P D+ L IR E+
Sbjct: 105 VTIKPGDMALCMYIRREK 122
```

>TC005945-PA (ChLG8:5643896..5650497)

Length = 769

Score = 28.5 bits (62), Expect = 0.80  
Identities = 23/90 (25%), Positives = 44/90 (48%), Gaps = 14/90 (15%)

[GBrowse] [Subject FASTA]

```
Query: 51 EIRRYQKSTELLIRKLPFQRLVREIAQDFKTDL-----RFQSSAVMALQEASEAYLV 102
E + Y K+ E+L K+PF+R+ + + QD + RF + +Q + + +
Sbjct: 210 EEKNYVKALEVL--KIPFKRIPKRVTDLVNMMLELLLLLTDRETECLDIFIQHCNFTFEI 267
Query: 103 GLFEDTNLCAIHAKRVTIMPKDIQLARRIR 132
+ ED N AI + +MP IQ+ +++
```

Sbjct: 268 TVNED-NTIAIDS---YVMPPSIQIDLKVK 293

>**TC030701-PA (ChLG3:35759566..35834262)**

Length = 18024

Score = 26.2 bits (56), Expect = 4.0  
Identities = 16/68 (23%), Positives = 32/68 (47%)

[GBrowse] [Subject FASTA]

Query: 14 GKAPRKQLATKAARKSAPATGGVKKPHRYRPGTVALREIRRYQKSTELLIRKLPFQRLVR 73  
GK P+K + A K A VK+ T ++EI ++ ++ K F++ +  
Sbjct: 15978 GKVPKKPEEEEEAVKLLKAPERVKEEELPEAKTPKVKEIEEKEEPEKIEFEKPEFEKPEK 16037  
Query: 74 EIAQDFKT 81  
E+ ++ K+  
Sbjct: 16038 EVPEEEKS 16045

>**TC009308-PA (ChLG7:1817276..1819114)**

Length = 518

Score = 25.4 bits (54), Expect = 6.7  
Identities = 19/55 (34%), Positives = 27/55 (49%), Gaps = 1/55 (1%)

[GBrowse] [Subject FASTA]

Query: 82 DLRFQSSAVMALQEASEAYLVGLFEDTNLCAIHAKRVTIMPKDIQLA-RRIRGER 135  
DLR + V LQ+ E+ V L ++ L +K + DIQL +RIR R  
Sbjct: 326 DLRQKDQLVKHLQOEIESLKVVELMKEKCLSENKSKELLEKSDDIQLLNKRIRSSR 380

>**TC015111-PA (ChLG6:5039228..5049650)**

Length = 509

Score = 25.4 bits (54), Expect = 6.7  
Identities = 13/42 (30%), Positives = 21/42 (50%)

[GBrowse] [Subject FASTA]

Query: 71 LVREIAQDFKTDLRFQSSAVMALQEASEAYLVGLFEDTNLCA 112  
+VR+ D + S V QE +EA++ L+ T +CA  
Sbjct: 223 IVRQDGLDLPIGIYRPSIVVSTYQEPTEAWINNLYGPTGVCA 264

>**TC000231-PA (ChLG2:18781787..18783630)**

Length = 424

Score = 25.4 bits (54), Expect = 6.7  
Identities = 22/92 (23%), Positives = 37/92 (40%), Gaps = 5/92 (5%)

[GBrowse] [Subject FASTA]

Query: 15 KAPRKQLATKAARKSAPATGGVKKPHRYRPGTVALREIRRYQKSTELLIRKLPFQRLVRE 74  
+ P+ A S A G KP RP V L+ +Y + ++LP+ V  
Sbjct: 43 RQPKASTAHMVKSFSRSAAGKQIKPETLRPPQVLLKTV-KYLLCDVINTKRLPYWHSV-- 99  
Query: 75 IAQDFKTDLRFQSSAVMALQEASEAYLVGLFE 106  
DF TD + +Q S+A + + +  
Sbjct: 100 --YDFITDRLLAVRQDLVVQNVSKAESITILQ 129

>**TC010721-PA (Unknown:11584977..11586401)**

Length = 451

Score = 25.0 bits (53), Expect = 8.8  
Identities = 12/38 (31%), Positives = 18/38 (47%)

[GBrowse][Subject FASTA]

Query: 3 RTKQTARKSTGGKAPRKQLATKAARKSAPATGGVKKPH 40  
RT T+ ++T K P +Q A + + P T PH  
Sbjct: 389 RTPLTSPQTTSLKIPSRQTAISPSTPATPTTSRTPFPH 426

>**TC001887-PA (Unknown:10737145..10747799)**

Length = 1264

Score = 25.0 bits (53), Expect = 8.8  
Identities = 12/57 (21%), Positives = 30/57 (52%)

[GBrowse][Subject FASTA]

Query: 42 YRPGTVALREIRRYQKSTELLIRKLPFQRLVREIAQDFKTDLRFQSSAVMALQEASE 98  
Y + L+E++R + + + L+R++A++ + + F+ AV + E++E  
Sbjct: 56 YGKMSTRKELQRKYHDENIKVARKDGLLLIRDMAKEVQNMMSFKIEAVRRITESAE 112

Database: Official\_Gene\_Proteins.fa  
Posted date: Jun 15, 2011 2:12 PM  
Number of letters in database: 7,426,099  
Number of sequences in database: 16,531

| Lambda | K     | H     |
|--------|-------|-------|
| 0.321  | 0.131 | 0.361 |

| Gapped<br>Lambda | K      | H     |
|------------------|--------|-------|
| 0.267            | 0.0410 | 0.140 |

Matrix: BLOSUM62

Gap Penalties: Existence: 11, Extension: 1  
Number of Hits to DB: 1,669,841  
Number of Sequences: 16531  
Number of extensions: 57156  
Number of successful extensions: 177  
Number of sequences better than 10.0: 13  
Number of HSP's better than 10.0 without gapping: 10  
Number of HSP's successfully gapped in prelim test: 3  
Number of HSP's that attempted gapping in prelim test: 162  
Number of HSP's gapped (non-prelim): 17  
length of query: 136  
length of database: 7,426,099  
effective HSP length: 86  
effective length of query: 50  
effective length of database: 6,004,433  
effective search space: 300221650  
effective search space used: 300221650  
T: 11  
A: 40  
X1: 16 ( 7.4 bits)  
X2: 38 (14.6 bits)  
X3: 64 (24.7 bits)  
S1: 41 (21.9 bits)  
S2: 53 (25.0 bits)
